# Supplementary material
Source: Springer Nature journal article supplement (https://www.springermedizin.de/resource/supplementary/12967_2011_739_MOESM1_ESM.pdf/9577358)
Supplement: MOESM1 [file 9577358]

- *Intramural investigators will be permitted to license inventions or discoveries made in their NIH laboratories and to form companies for commercialization, while remaining intramural employees*
- *NIH will maintain control and oversight of licensed intellectual property, ensuring that investigators actively translate to the public in a transparent and ethically responsible manner*
- *Investigators will be permitted to utilize their intramural laboratories as locations for their company to enable seamless integration of efforts*
- *The program will not require new funding, as investigators will utilize current laboratory space and resources*
- *NIH will collect royalty payments on all successful projects and these monies will be funneled back into biomedical research; and, investigators will subsidize their own salaries and research support as their companies develop*
- *NIH as an institution will carefully evaluate the effectiveness of the percubator as a general method for supporting research and delivery in government and other settings*
- *The percubator program will provide entrepreneurship training for students, fellows, and investigators, with the goal of producing a cadre of researchers who can translate laboratory and clinical advances into public benefit*
